# Supplementary material for: Genomic Analysis Reveals Pleiotropic Alleles at EDN3 and BMP7 Involved in Chicken Comb Color and Egg Production
Source: Front Genet. 2019 Jun 28;10:612. doi: 10.3389/fgene.2019.00612 (PMC6611142; doi:10.3389/fgene.2019.00612)
Supplement: Supplementary file 7 [file Table_2.xlsx]

## Sheet: Sheet1
Supplementary Table 2. Significant SNPs revealed by GWAS of comb color
Chr	Affymetrix Probe ID	rs	Position	allele1	allele0	P value	Duplication	Gene symbol	SNP-gene relationship	Distance
20	AX-76199743	NA	10971168	C	T	0	Dup 1	EDN3	downstream	30386
20	AX-76201423	NA	11591137	G	A	8.65956e-65	Dup 2	C20H20ORF85	upstream	78500
20	AX-76201300	NA	11543951	A	G	2.38141e-40	Dup 2	C20H20ORF85	upstream	31314
20	AX-76201480	NA	11616481	A	G	1.07639e-39	Dup 2	C20H20ORF85	upstream	103844
20	AX-76201429	NA	11594767	T	C	8.37452e-25	Dup 2	C20H20ORF85	upstream	82130
20	AX-76199919	NA	11030966	C	T	1.79675e-24	Dup 1	EDN3	downstream	29412
20	AX-76199784	NA	10983967	C	T	1.59677e-22	Dup 1	EDN3	upstream	17587
20	AX-76199800	NA	10991662	C	T	1.59677e-22	Dup 1	EDN3	upstream	9892
20	AX-76199789	NA	10987331	G	A	3.08793e-22	Dup 1	EDN3	upstream	14223
20	AX-76201355	NA	11567733	T	C	3.54156e-22	Dup 2	C20H20ORF85	upstream	55096
20	AX-76199785	NA	10985503	C	T	3.83718e-22	Dup 1	EDN3	upstream	16051
20	AX-76201424	NA	11592590	T	C	8.58309e-21	Dup 2	C20H20ORF85	upstream	79953
20	AX-76201452	NA	11605373	A	C	8.58309e-21	Dup 2	C20H20ORF85	upstream	92736
20	AX-76199896	NA	11023595	A	G	8.58309e-21	Dup 1	EDN3	downstream	22041
20	AX-80927854	rs13634912	11625060	C	G	5.66212e-17		C20H20ORF85	upstream	112423
20	AX-76199911	NA	11029089	T	C	9.89781e-17	Dup 1	EDN3	downstream	27535
20	AX-76199682	NA	10953688	A	G	1.61037e-16		SNRPN	synon	0
20	AX-76201512	NA	11627335	G	A	7.5243e-16	Dup 2	C20H20ORF85	upstream	114698
20	AX-76200189	NA	11125617	C	T	3.00231e-15		GNAS	intron	0
20	AX-76200161	NA	11113512	A	G	3.00231e-15		TH1L	upstream	780
20	AX-80853401	rs314663571	10965771	C	G	3.16007e-15		DDX27	upstream	3835
20	AX-80815822	rs313498668	10905641	C	G	3.22842e-15		CDH22	upstream	20000
20	AX-76199675	NA	10950531	C	A	3.22842e-15		ELMO2	upstream	3897
20	AX-76200001	NA	11058629	C	T	3.95131e-15	Dup 1	SLMO2	upstream	15512
20	AX-76200035	NA	11069818	T	C	4.80774e-15	Dup 1	SLMO2	upstream	4323
20	AX-80868985	rs14278808	11078765	C	G	5.79761e-15		SLMO2	UTR-3	0
20	AX-76199666	NA	10947464	A	G	7.32933e-15		ELMO2	upstream	830
20	AX-76200905	NA	11395531	A	C	7.32933e-15		VAPB	intron	0
20	AX-76199599	NA	10922992	G	A	9.85986e-15		CDH22	upstream	37351
20	AX-76199979	NA	11049397	T	C	1.3355e-14	Dup 1	ZNF831	downstream	1763
20	AX-76199981	NA	11049513	T	C	3.72333e-14	Dup 1	ZNF831	downstream	1647
20	AX-76200924	NA	11400528	C	T	1.49059e-13		VAPB	intron	0
20	AX-76199728	NA	10966842	A	G	1.82044e-13		DDX27	upstream	4906
20	AX-76200958	NA	11413493	T	C	1.92646e-13		VAPB	intron	0
20	AX-76199521	NA	10889319	C	T	2.82507e-13		CDH22	upstream	3678
20	AX-76199323	NA	10817398	A	G	3.39823e-13		NCOA5	intron	0
20	AX-76199244	NA	10785456	C	T	3.39823e-13		SLC12A5	intron	0
20	AX-76201688	NA	11698946	G	A	3.42902e-13		C20H20ORF85	upstream	186309
20	AX-76200910	NA	11397510	G	A	4.60557e-13		VAPB	intron	0
20	AX-76199990	NA	11053315	G	A	6.99852e-13	Dup 1	SLMO2	upstream	20826
20	AX-76199351	NA	10825415	T	C	8.46803e-13		CD40	intron	0
20	AX-76199367	NA	10829209	G	A	8.46803e-13		CDH22	downstream	22401
20	AX-76199312	NA	10812897	G	A	9.05864e-13		NCOA5	intron	0
20	AX-76200965	NA	11416280	T	C	9.71619e-13		VAPB	intron	0
20	AX-80774771	rs317122819	11026609	G	C	9.71619e-13		ZNF831	downstream	24551
20	AX-76200984	NA	11420645	T	C	1.40857e-12		RAB22A	intron	0
20	AX-76200492	NA	11234934	T	C	1.41982e-12		NPEPL1	downstream	28800
20	AX-76200157	NA	11111810	A	G	2.24128e-12		TH1L	intron	0
20	AX-76199966	NA	11045054	A	C	3.7878e-12	Dup 1	ZNF831	downstream	6106
20	AX-76200144	NA	11105692	A	G	5.78416e-12		TH1L	intron	0
20	AX-76200153	NA	11109978	C	T	5.78416e-12		TH1L	intron	0
20	AX-76199332	NA	10820033	T	C	6.89898e-12		NCOA5	intron	0
20	AX-76199604	NA	10924913	T	C	1.66856e-11		CDH22	upstream	39272
20	AX-76199891	NA	11021661	A	G	2.26427e-11	Dup 1	EDN3	downstream	20107
20	AX-76201453	NA	11605862	T	C	2.4887e-11	Dup 2	C20H20ORF85	upstream	93225
20	AX-80957771	rs14279875	12023174	G	C	2.97647e-11		BMP7	downstream	90589
20	AX-76199732	NA	10968280	C	T	3.20912e-11		DDX27	upstream	6344
20	AX-76199618	NA	10929957	A	G	3.20912e-11		SLC35C2	intron	0
20	AX-76199319	NA	10814822	T	C	3.31198e-11		NCOA5	intron	0
20	AX-76200095	NA	11087670	C	T	3.57638e-11	Dup 1	LOC101747896	intron	0
20	AX-76200002	NA	11058677	A	C	4.35732e-11	Dup 1	SLMO2	upstream	15464
20	AX-76199301	NA	10807052	A	C	5.08266e-11		NCOA5	downstream	5174
20	AX-76200017	NA	11064498	G	T	7.04525e-11	Dup 1	SLMO2	upstream	9643
20	AX-76199674	NA	10950272	G	T	8.1634e-11		ELMO2	upstream	3638
20	AX-76201588	NA	11661323	G	A	1.0289e-10	Dup 2	C20H20ORF85	upstream	148686
20	AX-76200184	NA	11123092	G	A	1.0289e-10		GNAS	intron	0
20	AX-76199641	NA	10937631	A	G	1.0844e-10		ELMO2	intron	0
20	AX-76199329	NA	10818960	A	G	1.65224e-10		NCOA5	intron	0
20	AX-76201958	NA	11821996	G	A	1.6872e-10		PCK1	upstream	50591
20	AX-76200026	NA	11067564	T	G	1.72214e-10	Dup 1	SLMO2	upstream	6577
20	AX-80964454	rs313420239	11805409	A	T	2.05205e-10		PCK1	upstream	34004
20	AX-80750304	rs313328052	11807411	T	A	2.05205e-10		PCK1	upstream	36006
20	AX-76201277	NA	11535909	G	A	2.33065e-10	Dup 2	C20H20ORF85	upstream	23272
20	AX-76201523	NA	11631629	C	T	2.33065e-10	Dup 2	C20H20ORF85	upstream	118992
20	AX-76199579	NA	10913467	T	C	2.34457e-10		CDH22	upstream	27826
20	AX-76200131	NA	11100848	T	G	2.34457e-10		CTSZ	intron	0
20	AX-76200151	NA	11108812	C	A	2.34457e-10		TH1L	intron	0
20	AX-76200120	NA	11096166	T	C	2.34457e-10	Dup 1	TUBB1	upstream	1695
20	AX-76199651	NA	10941710	A	G	2.42949e-10		ELMO2	intron	0
20	AX-76199681	NA	10953068	G	A	2.42949e-10		10953068	intron	0
20	AX-76200714	NA	11312447	A	G	3.03378e-10		STX16	upstream	25722
20	AX-76200781	NA	11343340	T	C	3.03378e-10		STX16	upstream	56615
20	AX-76200661	NA	11290591	A	G	3.09956e-10		STX16	upstream	3866
20	AX-76200815	NA	11355682	T	C	3.49722e-10		STX16	upstream	68957
20	AX-80911347	rs316569532	10747063	C	G	4.69084e-10		PCIF1	intron	0
20	AX-76201689	NA	11698989	C	T	4.81847e-10		C20H20ORF85	upstream	186352
20	AX-76201817	NA	11763514	G	A	4.81847e-10		PCK1	downstream	175
20	AX-80824756	rs315892799	11224700	C	G	5.99238e-10		NPEPL1	downstream	39034
20	AX-76202609	NA	12087111	G	A	7.79317e-10		BMP7	downstream	154526
20	AX-76202316	NA	11968182	T	G	9.79002e-10		BMP7	downstream	35597
20	AX-80935035	rs312622375	12053570	A	T	9.79002e-10		BMP7	downstream	120985
20	AX-76199565	NA	10908114	C	A	1.03668e-09		CDH22	upstream	22473
20	AX-76201520	NA	11631015	T	C	1.15415e-09	Dup 2	C20H20ORF85	upstream	118378
20	AX-76200572	NA	11261178	C	A	1.15415e-09		NPEPL1	downstream	2556
20	AX-76200856	NA	11372535	C	T	1.60509e-09		APCDD1L	intron	0
20	AX-80750029	rs16173386	11352266	T	A	1.78056e-09		STX16	upstream	65541
20	AX-76201807	NA	11758243	A	G	2.16801e-09		PCK1	downstream	5446
20	AX-76202105	NA	11881019	G	A	2.18029e-09		BMP7	upstream	10424
20	AX-80868038	rs16172418	10775737	G	C	3.08281e-09		MMP9	intron	0
20	AX-76201485	NA	11619063	A	G	3.15448e-09	Dup 2	C20H20ORF85	upstream	106426
20	AX-76202208	NA	11921770	A	G	3.45949e-09		BMP7	intron	0
20	AX-76200839	NA	11365170	T	G	3.57262e-09		STX16	upstream	78445
20	AX-76199432	NA	10855678	T	C	3.73317e-09		CDH22	intron	0
20	AX-76199038	NA	10705665	A	G	3.73317e-09		DNTTIP1	intron	0
20	AX-76201510	NA	11626868	G	A	3.76546e-09	Dup 2	C20H20ORF85	upstream	114231
20	AX-76200457	NA	11222164	C	T	3.95958e-09		NPEPL1	downstream	41570
20	AX-76203459	NA	12365607	G	T	4.80633e-09		DOK5	downstream	97842
20	AX-76203480	NA	12375612	A	G	5.06302e-09		DOK5	downstream	87837
20	AX-76202601	NA	12084209	T	C	5.09441e-09		BMP7	downstream	151624
20	AX-80960324	rs14280176	12254322	A	T	5.78656e-09		FAM210B	upstream	17630
20	AX-76199445	NA	10860134	G	A	7.26708e-09		CDH22	intron	0
20	AX-76202539	NA	12053623	G	A	7.65559e-09		BMP7	downstream	121038
20	AX-80857255	rs314833106	10750813	C	G	9.88344e-09		PCIF1	downstream	331
20	AX-76203373	NA	12337290	A	C	1.32755e-08		CBLN4	intron	0
20	AX-76202058	NA	11863949	A	G	2.83332e-08		SPO11	intron	0
20	AX-80776832	rs13635074	11915575	A	T	3.09592e-08		BMP7	intron	0
20	AX-76201821	NA	11764825	A	G	3.20123e-08		PCK1	intron	0
20	AX-76199068	NA	10718563	G	A	3.27175e-08		ACOT8	intron	0
20	AX-76199929	NA	11032969	G	A	3.67216e-08	Dup 1	ZNF831	downstream	18191
20	AX-76201251	NA	11525615	C	T	4.41619e-08	Dup 2	C20H20ORF85	upstream	12978
20	AX-76202775	NA	12136337	C	T	5.1293e-08		BMP7	downstream	203752
20	AX-76201595	NA	11663752	T	C	5.45719e-08	Dup 2	C20H20ORF85	upstream	151115
20	AX-76199387	NA	10838667	A	C	5.46951e-08		CDH22	downstream	12943
20	AX-76199595	NA	10920969	C	T	6.21596e-08		CDH22	upstream	35328
20	AX-76200080	NA	11084005	G	A	6.21596e-08	Dup 1	LOC101747896	intron	0
20	AX-76200092	NA	11086895	T	G	6.21596e-08	Dup 1	LOC101747896	intron	0
20	AX-76201638	NA	11680193	T	C	6.69603e-08	Dup 2	C20H20ORF85	upstream	167556
20	AX-76201643	NA	11681503	G	A	6.69603e-08	Dup 2	C20H20ORF85	upstream	168866
20	AX-76201650	NA	11684352	A	G	6.69603e-08	Dup 2	C20H20ORF85	upstream	171715
20	AX-76200166	NA	11114958	C	A	6.69603e-08		TH1L	upstream	2226
20	AX-76203296	NA	12314297	C	A	7.22245e-08		LOC419333	downstream	5203
20	AX-76201444	NA	11600932	A	C	7.80316e-08	Dup 2	C20H20ORF85	upstream	88295
20	AX-76201481	NA	11617478	T	C	9.30642e-08	Dup 2	C20H20ORF85	upstream	104841
20	AX-80898173	rs316329000	10962112	T	A	9.48882e-08		DDX27	upstream	176
20	AX-80912192	rs317225254	12107152	G	C	1.03943e-07		BMP7	downstream	174567
20	AX-76202704	NA	12117839	C	T	1.03943e-07		BMP7	downstream	185254
20	AX-76203532	NA	12394530	T	C	1.0412e-07		DOK5	downstream	68919
20	AX-76200211	NA	11132469	C	A	1.1497e-07		GNAS	intron	0
*Dup 1: Duplication 1
Dup 2: Duplication2
